# Supplementary material for: A transient protein folding response targets aggregation in the early phase of TDP-43-mediated neurodegeneration
Source: PubMed Central journal article supplement (PMC10876645; doi:10.1038/s41467-024-45646-9), 2024-02-19
Supplement: 41467_2024_45646_MOESM3_ESM.pdf [file 41467_2024_45646_MOESM3_ESM.pdf]

## **Description of Additional Supplementary Files**

**File Name:** Supplementary Data 1

**Description:** Temporal quantitative proteomics control and rNLS cortex overall results.

**File Name:** Supplementary Data 2

**Description:** Quantitative proteomics control and rNLS cortex pairwise comparisons at each timepoint.

**File Name:** Supplementary Data 3

**Description:** Common and unique proteins up and down at each timepoint from Venn diagram.

**File Name:** Supplementary Data 4

**Description:** All metascape gene ontology analysis, cortex timepoint, WCNA modules, Dnajb5 knockout cortex.

**File Name:** Supplementary Data 5

**Description:** WPCNA and PloGO gene ontology of control and rNLS cortex proteomics.
